# Supplementary material for: Efficient intermediate-temperature steam electrolysis with Y : SrZrO3–SrCeO3 and Y : BaZrO3–BaCeO3 proton conducting perovskites
Source: Royal Society of Chemistry journal article supplement (doi:10.1039/c8ta04019b), 2018-01-01
Supplement: c8ta04019b1.pdf [file c8ta04019b1.pdf]

## Supporting Information

### Efficient intermediate-temperature steam electrolysis with Y:SrZrO<sub>3</sub>–SrCeO<sub>3</sub> and Y:BaZrO<sub>3</sub>–BaCeO<sub>3</sub> proton Conducting perovskites

Kwati Leonard<sup>(ae)</sup>, Yuji Okuyama<sup>(b)</sup>, Yasuhiro Takamura<sup>(c)</sup>, Young-Sung Lee<sup>(a)</sup>, Kuninori Miyazaki<sup>(d)</sup>  
Mariya E. Ivanova<sup>(e)</sup> Wilhelm A. Meulenberg<sup>(e)</sup> Hiroshige Matsumoto<sup>(ac)</sup>

<sup>(a)</sup>*International Institute for Carbon Neutral Energy Research (I2CNER), Kyushu University 744 Motooka, Nishi-ku, Fukuoka 819-0395, Japan*

<sup>(b)</sup>*Organization for the Promotion of Tenure Track, University of Miyazaki, 1-1 Gakuenkibanadai Nishi, 889-2192, Japan*

<sup>(c)</sup>*Department of Hydrogen Energy System, Kyushu University 744 Motooka, Nishi-ku, Fukuoka 819-0395, Japan*

<sup>(d)</sup>*Strategic Institute of Technology and Research Center Nippon Shokubai Co. LTD, 992-1 Nishioki, Himeji, Hyogo 671-1292, Japan*

<sup>(e)</sup>*Institute of Energy- and Climate Research IEK-1, Forschungszentrum Jülich GmbH*

\*Corresponding authors

E-mail: [kwati@i2cner.kyushu-u.ac.jp](mailto:kwati@i2cner.kyushu-u.ac.jp)

K. L. +81-92-802-6706: fax: +81-92-802-6706.

E-mail: [matsumoto@i2cner.kyushu-u.ac.jp](mailto:matsumoto@i2cner.kyushu-u.ac.jp)

H.M.: Tel: +81-92-802-6706: fax: +81-92-802-6705.

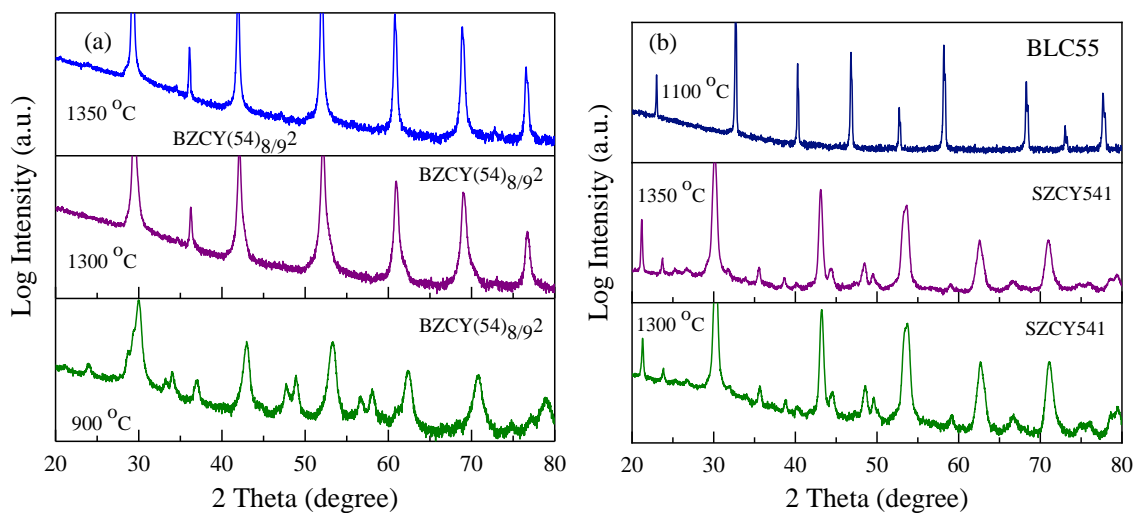

Figure S1. XRD patterns of (a) BZCY(54)<sub>8/92</sub> powder calcined at 900, 1300 and 1350 °C (b) SZCY541 powder calcined at 1300, 1350 °C and BLC calcined at 1100

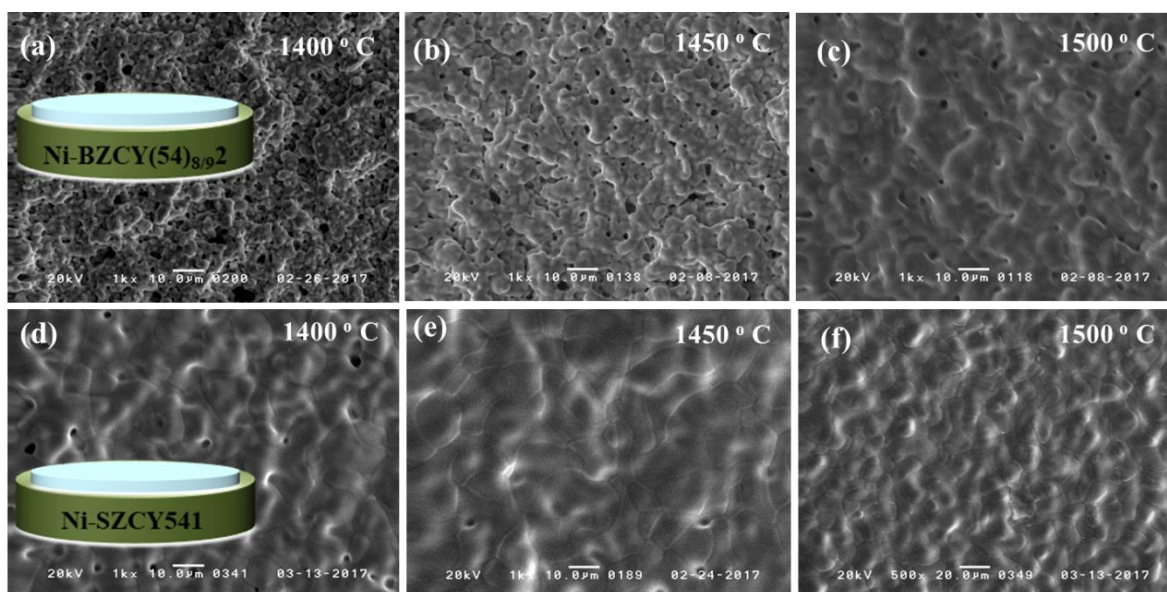

Figure S2. SEM micrographs of BZCY(54)<sub>8/92</sub> surface view, supported on NiO-BZCY(54)<sub>8/92</sub> cathode substrate after sintering at (a) 1400, (b) 1450, (c) 1500 °C and on NiO-SZCY541 cathode substrate after sintering at (d) 1400 (e) 1450 (f) 1500 °C

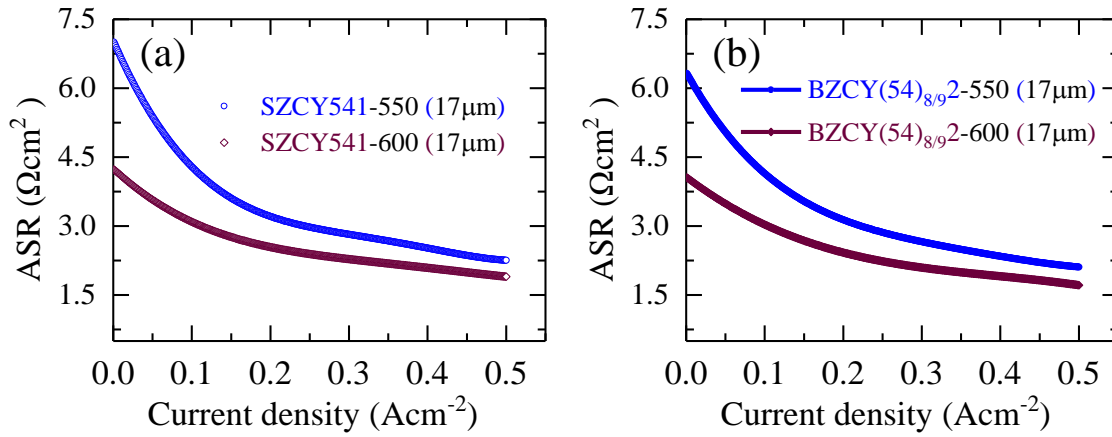

Figure S3. The area specific resistances (ASRs) extrapolated from the gradient of the I-V curves (a) BLC|SZCY541|Ni-SZCY541 (b) BLC|BZCY(54)<sub>8/9</sub>2|Ni-SZCY541 cathode supported button type single cells

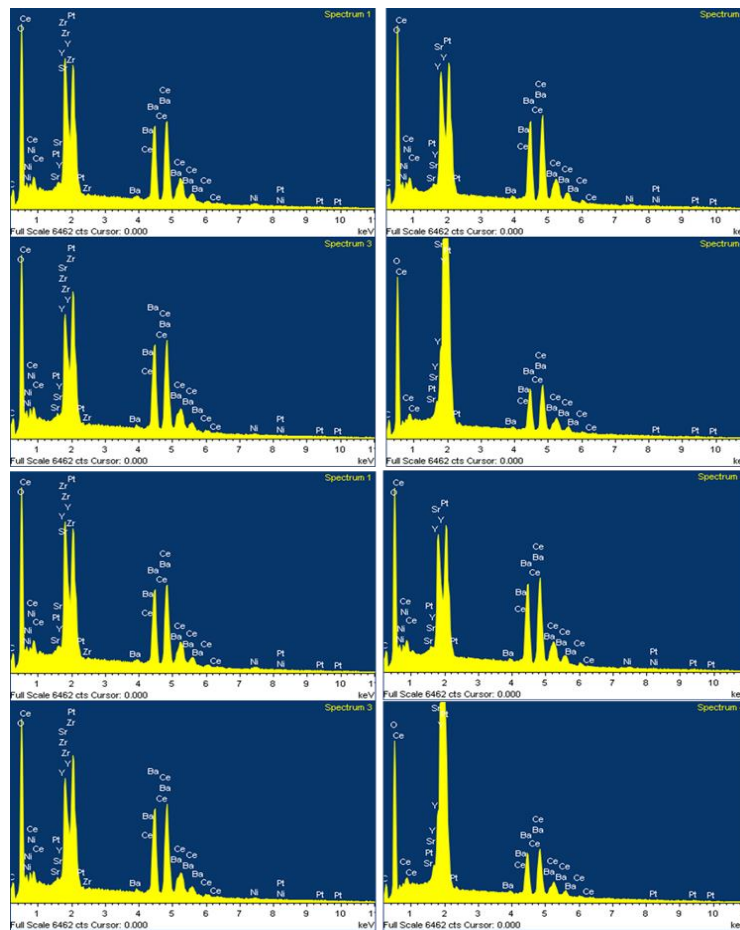

Figure S4. EDS analysis of a polished cross section of a typical BLC|BZCY(54)<sub>8/9</sub>2| Ni-SZCY541

cathode supported button cell shown in Fig 7

Table S1 Summary of results obtained from Rietveld analysis of the X-ray powder diffraction data for BZCY(54)<sub>8/92</sub> and SZCY541 at 295K.

| BZCY(54) <sub>8/92</sub> electrolyte powder |                                | SZCY541 electrolyte powder                            |
|---------------------------------------------|--------------------------------|-------------------------------------------------------|
| Parameters                                  | XRD data analysis              | XRD data analysis                                     |
| <i>Space group</i>                          | <i>Pm<math>\bar{3}</math>m</i> | <i>Pnma</i>                                           |
| $a=b=c(\text{\AA})$                         | 4.3035(2)                      | $a = 5.9668(4)$<br>$b = 8.3850(6)$<br>$c = 5.9184(4)$ |
| $V(\text{\AA}^3)$                           | 79.705                         | 296.111                                               |
| $R_p$                                       | 6.25                           | 7.48                                                  |
| $R_{wp}$                                    | 9.50                           | 10.9                                                  |
| $R_{Bragg}$                                 | 5.44                           | 4.67                                                  |
